# Supplementary material
Source: PubMed Central journal article supplement (PMC6098723)

**(a)**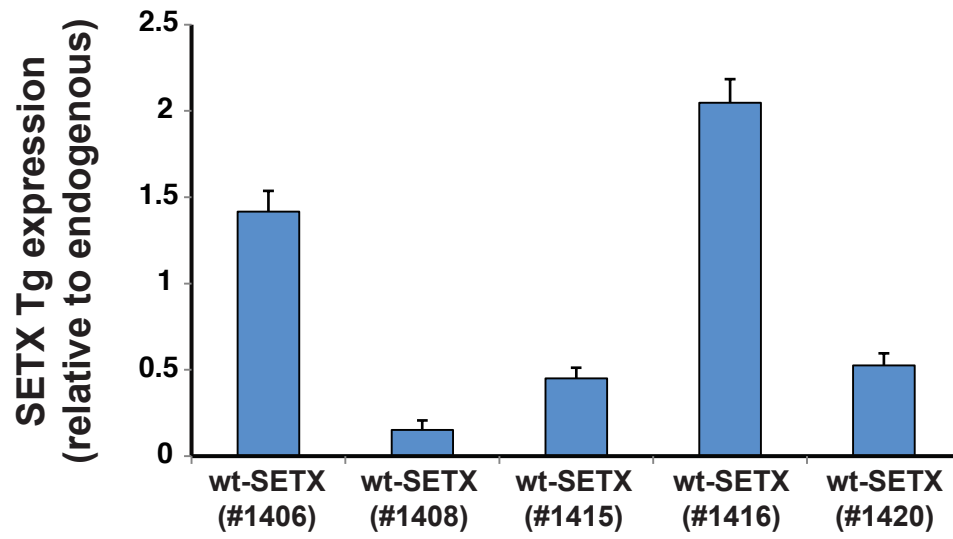**(b)**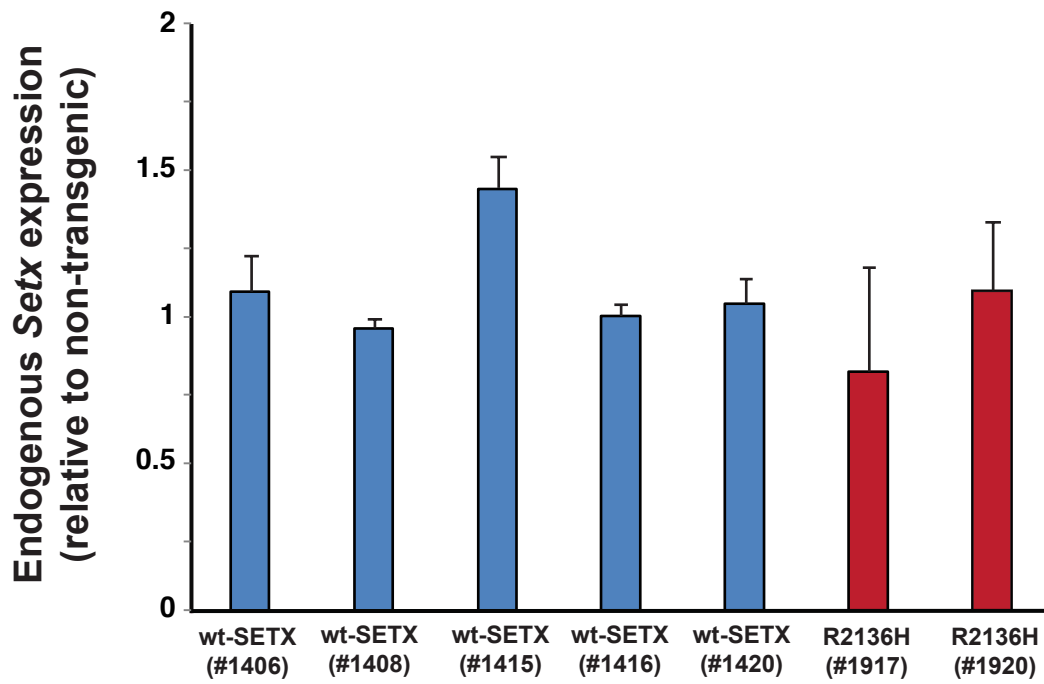

Supplement: NIHMS965176-supplement-401_2018_1852_MOESM2_ESM.pdf [file NIHMS965176-supplement-401_2018_1852_MOESM2_ESM.pdf]

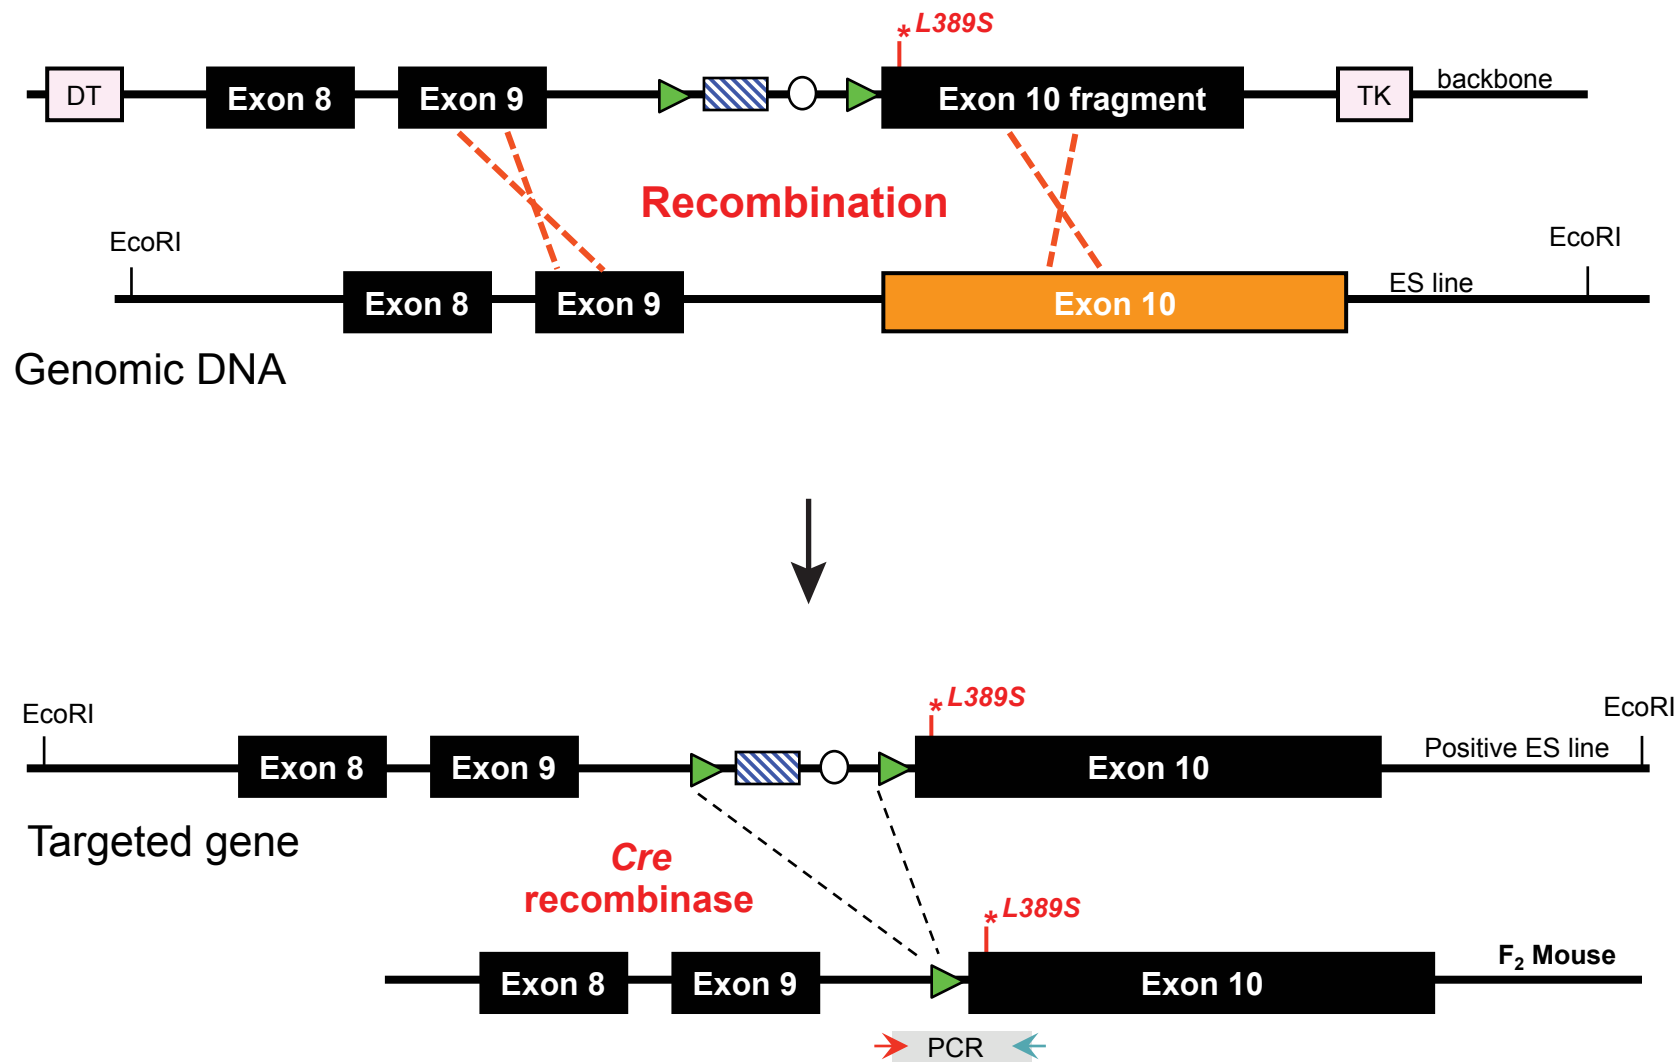

Supplement: NIHMS965176-supplement-401_2018_1852_MOESM3_ESM.pdf [file NIHMS965176-supplement-401_2018_1852_MOESM3_ESM.pdf]

**(a)**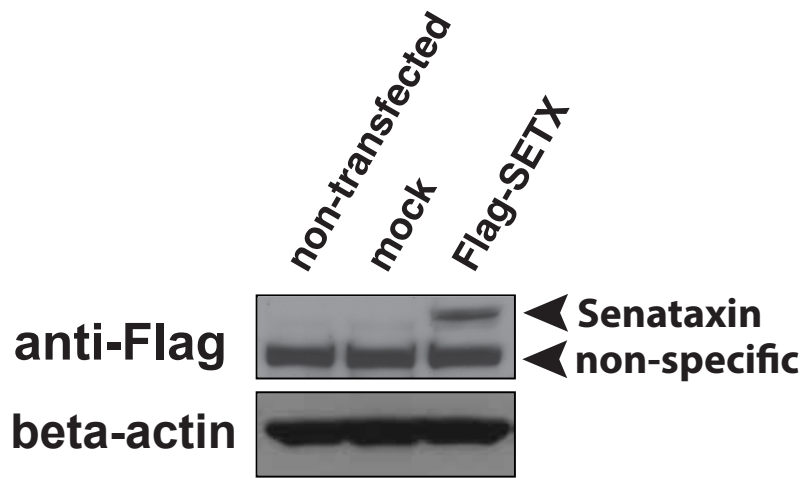**(b)**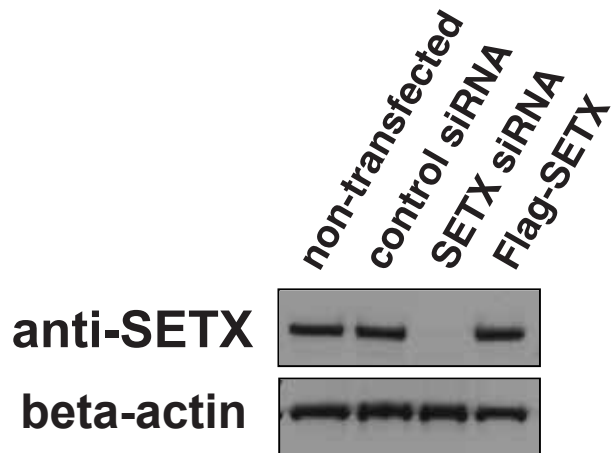

Supplement: NIHMS965176-supplement-401_2018_1852_MOESM4_ESM.pdf [file NIHMS965176-supplement-401_2018_1852_MOESM4_ESM.pdf]

(a)

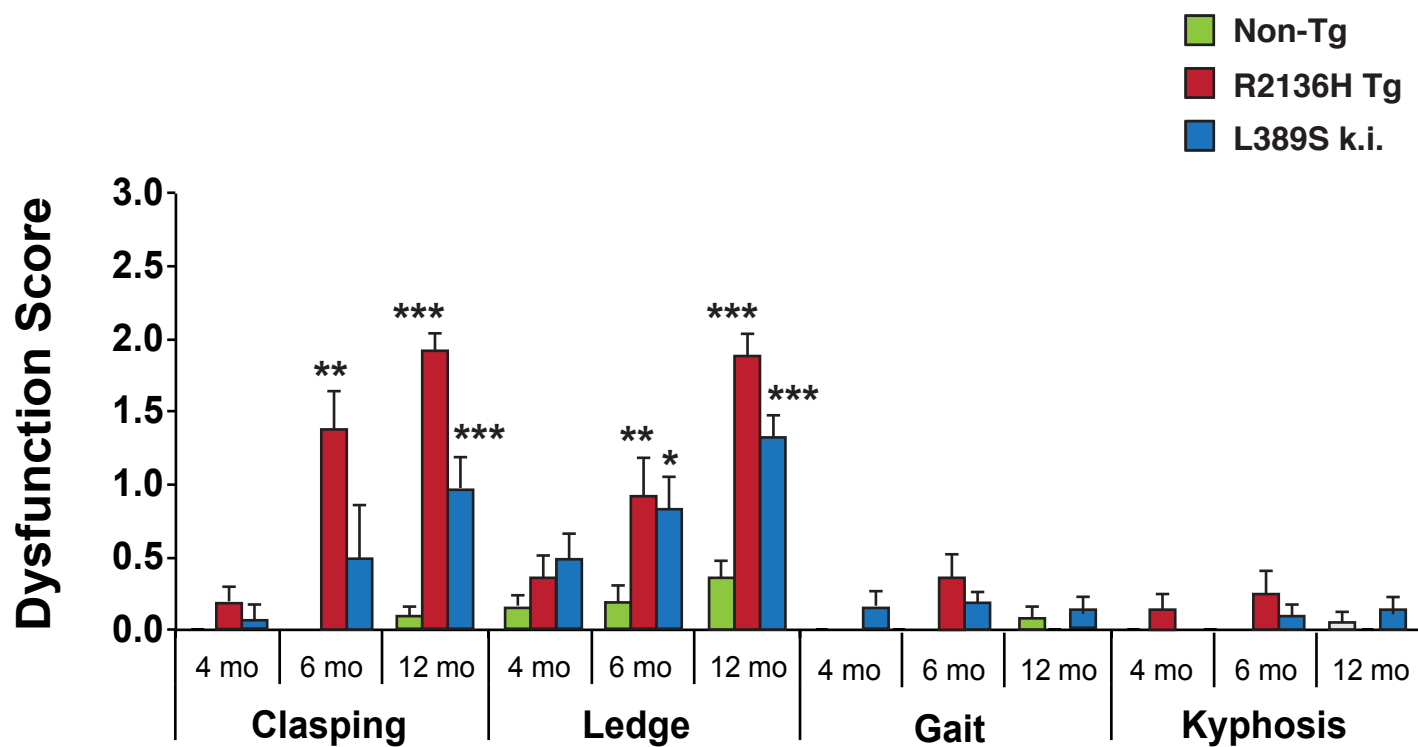

(b)

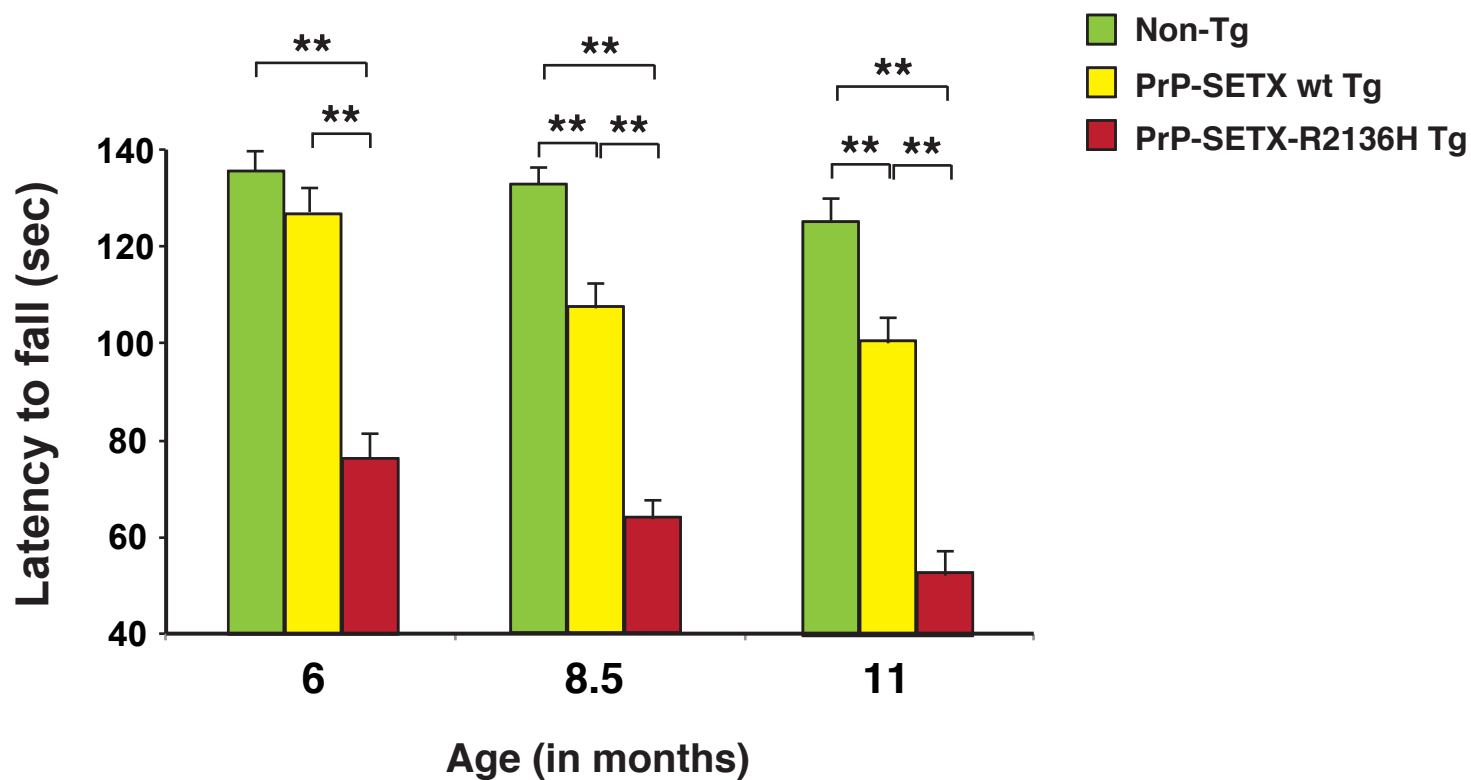

Supplement: NIHMS965176-supplement-401_2018_1852_MOESM5_ESM.pdf [file NIHMS965176-supplement-401_2018_1852_MOESM5_ESM.pdf]

**(a)**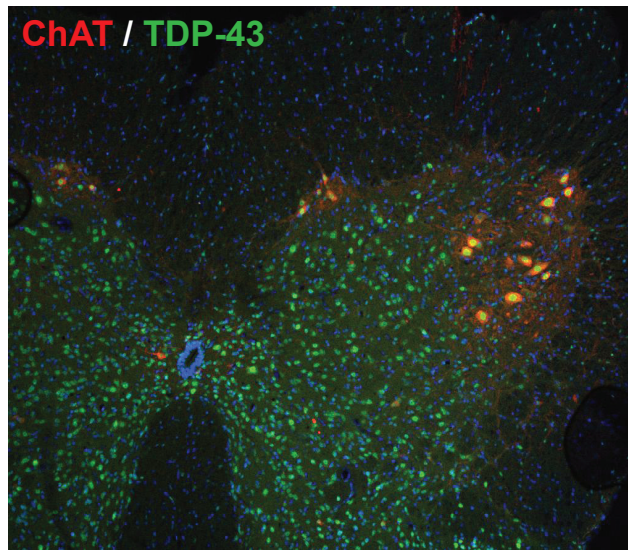**(b)**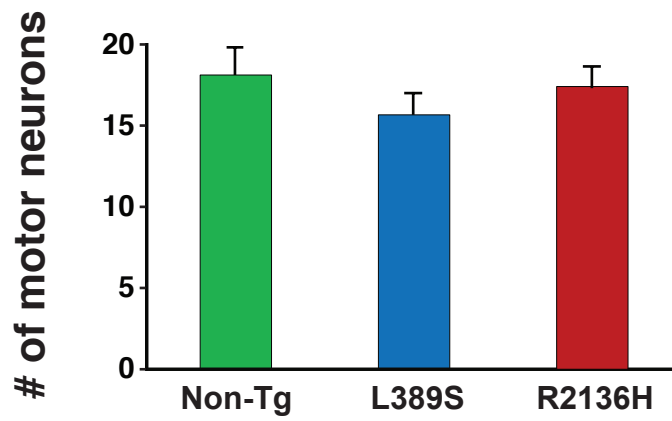**(c)**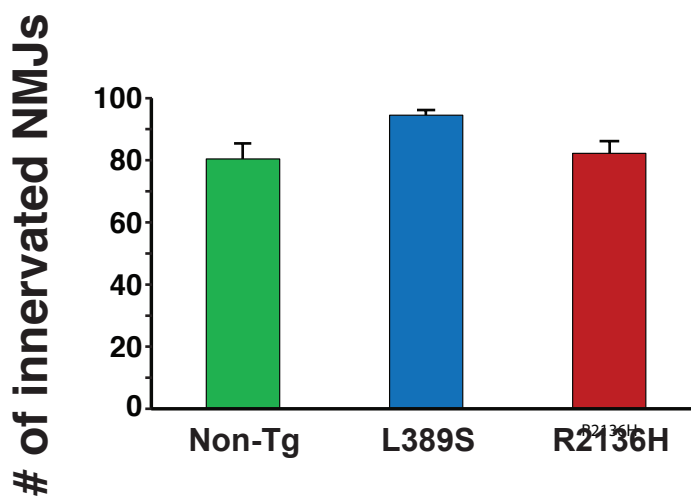

Supplement: NIHMS965176-supplement-401_2018_1852_MOESM6_ESM.pdf [file NIHMS965176-supplement-401_2018_1852_MOESM6_ESM.pdf]

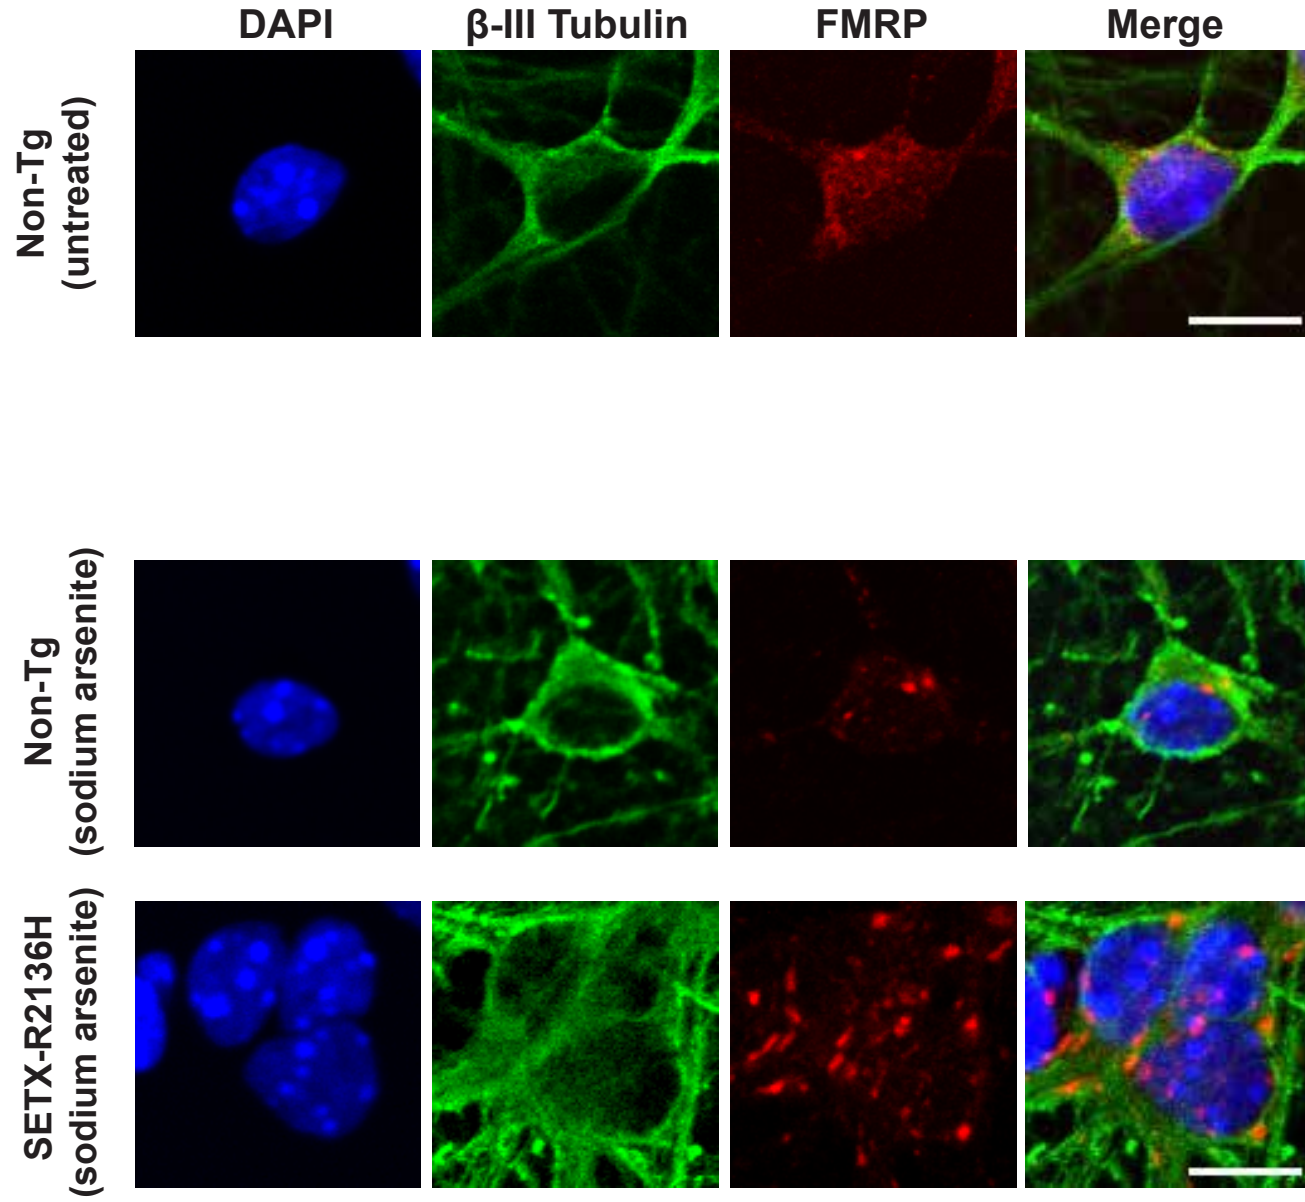

Supplement: NIHMS965176-supplement-401_2018_1852_MOESM7_ESM.pdf [file NIHMS965176-supplement-401_2018_1852_MOESM7_ESM.pdf]
